# Supplementary material for: A unified theoretical framework for the geometry of cognitive dynamics
Source: Research Square preprint supplement (doi:10.21203/rs.3.rs-7926249/v1), 2025-11-04
Supplement: Supplementary file 1 [file 319cc004c081601818dcf773.pdf]

# Supplementary Information

## 1 Supplementary Figures

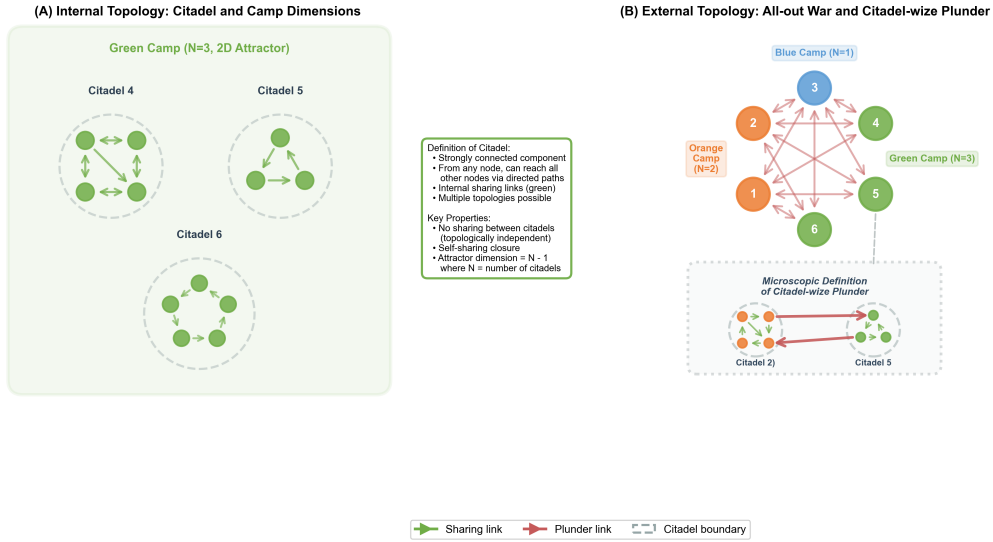

**Figure 1: Topological Design Principles of the "Camp-Citadel" Model.** (A) **Internal Topology: Citadel and Camp Dimensions.** This panel illustrates how attractor dimension is determined by a camp's internal topology. A "Camp" (e.g., "Green Camp",  $N=3$ ) is composed of multiple ( $N$ ) independent "Citadels" (e.g., Citadels 4, 5, 6). A "Citadel" is a "sharing-cohesive unit," with its internal micro-nodes strongly connected by **green "Sharing links"**. Critically, there are no sharing links between citadels, making them "topologically independent." The attractor dimension is determined by  $N - 1$  (here, 2D). (B) **External Topology: All-out War and Citadel-wise Plunder.** This panel illustrates how multistability is achieved. The "all-out war" topology is established via **red "Plunder links"**, connecting all citadels that belong to different camps (e.g., Blue  $N=1$ , Orange  $N=2$ , Green  $N=3$ ). The magnified "Microscopic Definition" box details the "citadel-wise plunder" rule: the plunder relationship is defined at the micro-node level, where a link from at least one node in Citadel 2 to at least one node in Citadel 5 (and vice-versa) constitutes the macro-level plunder link.

## 2 Supplementary Note: Mathematical Basis for Abstracting a Citadel as a Macro-Node

### 2.1 Argument

In our model, a "Citadel" is defined as a **strongly connected graph** of "sharing" links (see Figure S1A). We mathematically demonstrate here that for such a subsystem, when its internal dynamics (sharing) are much faster than its external dynamics (plundering), the resources  $X_i$  of all its constituent "micro-nodes" will necessarily converge to a **fixed ratio**.

This property is the mathematical foundation that allows us to abstract a Citadel (composed of many micro-nodes) into a single "macro-node" whose state is described solely by its total resource  $C_{\text{citadel}}$ , as described in Methods 4.4.

### 2.2 Definition of the Dynamical Matrix (A)

Consider an isolated Citadel of  $N$  micro-nodes with only "sharing" dynamics. From the main text's dynamical equations, the rate of change for node  $k$  is:

$$\frac{dX_k}{dt} = \sum_{i \neq k} (S_{ki}X_i - S_{ik}X_k)$$

where  $S_{ij} \geq 0$  is the sharing rate from node  $j$  to node  $i$ . We note that this sharing matrix  $S$  **does not need to be symmetric** (i.e.,  $S_{ki} \neq S_{ik}$  is allowed).

This linear system can be written in matrix form as  $\frac{d\mathbf{X}}{dt} = A\mathbf{X}$ , where  $\mathbf{X} = [X_1, \dots, X_N]^T$  is the resource vector. The elements of the dynamical matrix  $A$  are defined as:

- **Off-diagonal ( $k \neq i$ ):**  $A_{ki} = S_{ki}$
- **Diagonal ( $k = k$ ):**  $A_{kk} = -\sum_{i \neq k} S_{ik}$  (Note: the sum is over the index  $i$ , representing the total \*outgoing\* sharing rate from node  $k$ ).

### 2.3 Proof: Eigenvalue Stability ( $\text{Re}(\lambda) \leq 0$ )

We first prove that all eigenvalues  $\lambda$  of  $A$  have non-positive real parts. We use the **Gershgorin Circle Theorem** (applied to columns).

1. **Theorem:** All eigenvalues of  $A$  are located in the union of  $N$  disks  $D_k$  in the complex plane, where  $k$  is the column index.

2. **Disk Definition:** The  $k$ -th disk  $D_k$  is defined by:

- **Center  $C_k$ :** The diagonal element  $A_{kk}$ .

$$C_k = A_{kk} = - \sum_{i \neq k} S_{ik}$$

- **Radius  $R_k$ :** The sum of the absolute values of the off-diagonal elements in column  $k$ .

$$R_k = \sum_{i \neq k} |A_{ik}|$$

3. **Radius Calculation:** By our definition of  $A$ ,  $A_{ik} = S_{ik}$  (for  $i \neq k$ ). Since all sharing rates  $S_{ik} \geq 0$ , we have:

$$R_k = \sum_{i \neq k} S_{ik}$$

4. **Compare Center and Radius:** We find that for any disk  $D_k$ , the center  $C_k$  is exactly the negative of the radius  $R_k$ :

$$C_k = - \sum_{i \neq k} S_{ik} = -R_k$$

5. **Conclusion:** The  $k$ -th Gershgorin disk  $D_k$  is centered at  $-R_k$  (a non-positive real number) and has radius  $R_k$ . Any point  $z$  on this disk satisfies  $|z - (-R_k)| \leq R_k$ . The rightmost point of this disk on the real axis is  $z = C_k + R_k = (-R_k) + R_k = 0$ . This means *every* disk  $D_k$  is fully contained in the left half of the complex plane (including the imaginary axis). Since all

eigenvalues  $\lambda$  must lie in the union of these disks, all eigenvalues must satisfy  $\text{Re}(\lambda) \leq 0$ . This proves the sharing subsystem is stable and does not spontaneously diverge.

## 2.4 Proof: Simplicity of the Zero Eigenvalue

1. From the calculation in step 3.4, we showed that for every column  $k$ ,  $A_{kk} = -\sum_{i \neq k} S_{ik}$  and  $R_k = \sum_{i \neq k} S_{ik}$ . This means the sum of all elements in **column**  $k$  is zero:

$$\sum_{i=1}^N A_{ik} = A_{kk} + \sum_{i \neq k} A_{ik} = \left( -\sum_{i \neq k} S_{ik} \right) + \left( \sum_{i \neq k} S_{ik} \right) = 0$$

2. A matrix where every column sums to zero is equivalent to  $\mathbf{1}^T A = \mathbf{0}^T$ , where  $\mathbf{1}^T = [1, 1, \dots, 1]$ .
3. This proves that  $\mathbf{1}^T$  is a **left eigenvector** of  $A$  with a corresponding eigenvalue of  $\lambda = 0$ . Thus,  $\lambda_1 = 0$  must be an eigenvalue.
4. By the Perron-Frobenius theorem (as applied to graph Laplacians), for a **strongly connected** directed graph (our definition of a Citadel), the zero eigenvalue of its Laplacian (which  $A$  represents) is **simple** (i.e., non-degenerate, with a multiplicity of 1).
5. Combining this with the stability proof, we conclude that the system has exactly one eigenvalue  $\lambda_1 = 0$ , and all other  $N - 1$  eigenvalues  $\lambda_i$  ( $i \geq 2$ ) have strictly negative real parts ( $\text{Re}(\lambda_i) < 0$ ).

## 2.5 Proof: Convergence to a Fixed Ratio

1. The general solution to the linear system  $\frac{d\mathbf{X}}{dt} = A\mathbf{X}$  is a linear combination of its right eigenvectors  $\mathbf{v}_i$ :

$$\mathbf{X}(t) = c_1 e^{\lambda_1 t} \mathbf{v}_1 + \sum_{i=2}^N c_i e^{\lambda_i t} \mathbf{v}_i$$

2. Substituting  $\lambda_1 = 0$  and letting  $\mathbf{v}_1 = \mathbf{v}_{ss}$  (the steady-state eigenvector, which is strictly positive by Perron-Frobenius):

$$\mathbf{X}(t) = c_1 \mathbf{v}_{ss} + \sum_{i=2}^N c_i e^{\lambda_i t} \mathbf{v}_i$$

3. As  $t \rightarrow \infty$ , all terms in the summation decay to zero, since  $\text{Re}(\lambda_i) < 0$  for all  $i \geq 2$ .
4. Therefore, the system's final steady state  $\mathbf{X}_{ss}$  must converge to:

$$\mathbf{X}_{ss} = \lim_{t \rightarrow \infty} \mathbf{X}(t) = c_1 \mathbf{v}_{ss}$$

This proves the final state is proportional to the single, unique steady-state eigenvector  $\mathbf{v}_{ss}$ .

## 2.6 Solving for the Proportionality Coefficient ( $c_1$ )

1. We use the system's conservation law to find  $c_1$ . The total resource  $C_{\text{total}} = \sum_k X_k = \mathbf{1}^T \mathbf{X}$  is conserved, because (as shown in 4.2)  $\frac{d}{dt}(\mathbf{1}^T \mathbf{X}) = (\mathbf{1}^T A) \mathbf{X} = \mathbf{0}^T \mathbf{X} = 0$ .
2. We start with the initial condition:  $\mathbf{X}(0) = c_1 \mathbf{v}_{ss} + \sum_{i=2}^N c_i \mathbf{v}_i$ .
3. We left-multiply by the left eigenvector for  $\lambda_1 = 0$ , which is  $\mathbf{u}_1^T = \mathbf{1}^T$ :

$$\mathbf{1}^T \mathbf{X}(0) = \mathbf{1}^T \left( c_1 \mathbf{v}_{ss} + \sum_{i=2}^N c_i \mathbf{v}_i \right) = c_1 (\mathbf{1}^T \mathbf{v}_{ss}) + \sum_{i=2}^N c_i (\mathbf{1}^T \mathbf{v}_i)$$

4. By the biorthogonality of left and right eigenvectors,  $\mathbf{u}_1^T \mathbf{v}_i = \mathbf{1}^T \mathbf{v}_i = 0$  for all  $i \geq 2$ . The summation term vanishes.
5. We are left with:  $C_{\text{total}} = c_1 (\mathbf{1}^T \mathbf{v}_{ss})$ .
6. Solving for  $c_1$ :

$$c_1 = \frac{C_{\text{total}}}{\mathbf{1}^T \mathbf{v}_{ss}} = \frac{C_{\text{total}}}{\sum_j v_j}$$

where  $\sum_j v_j$  is the sum of the elements of the steady-state eigenvector (a fixed positive scalar).

## 2.7 Conclusion

Substituting  $c_1$  back into the steady-state equation  $\mathbf{X}_{ss} = c_1 \mathbf{v}_{ss}$ , we get:

$$\mathbf{X}_{ss} = \left( \frac{C_{\text{total}}}{\sum_j v_j} \right) \mathbf{v}_{ss}$$

This mathematically proves that regardless of the initial resource distribution  $\mathbf{X}(0)$ , as long as the total resource is  $C_{\text{total}}$ , the system will always converge to the exact same steady state  $\mathbf{X}_{ss}$ . In this state, the resource of each micro-node  $k$ ,  $X_k$ , is proportional to  $v_k$ , and the ratio between any two nodes  $\frac{X_i}{X_j} = \frac{v_i}{v_j}$  is a fixed constant.

This demonstrates that all micro-nodes are dynamically "locked" together as a "sharing-cohesive unit," fully justifying our abstraction of the entire Citadel as a single macro-node.
